# Supplementary material
Source: MDPI journal article supplement (https://www.mdpi.com/1424-2818/14/11/967)
Supplement: s1 [file s1]

**Table S1.** Pairwise distances (Tamura-Nei distance) based on 658 bp between COI sequences among species in Canuellidae.

|                                       | 1      | 2      | 3      | 4      | 5      | 6      | 7      | 8     |
|---------------------------------------|--------|--------|--------|--------|--------|--------|--------|-------|
| 1. <i>S. daecheonensis</i> [OP452900] |        |        |        |        |        |        |        |       |
| 2. <i>S. daecheonensis</i> [OP452901] | 0.609  |        |        |        |        |        |        |       |
| 3. <i>S. daecheonensis</i> [OP452902] | 0.612  | 0.917  |        |        |        |        |        |       |
| 4. <i>S. daecheonensis</i> [OP452903] | 0.609  | 0.913  | 0      |        |        |        |        |       |
| 5. <i>S. daecheonensis</i> [OP452904] | 0.609  | 0.913  | 0      | 0      |        |        |        |       |
| 6. <i>S. daecheonensis</i> [OP452905] | 0.609  | 0.913  | 0      | 0      | 0      |        |        |       |
| 7. <i>S. wonchoeli</i> [OP452899]     | 19.939 | 19.635 | 20.031 | 19.939 | 19.939 | 19.939 |        |       |
| 8. <i>C. perplexa</i> [MH670550]      | 22.070 | 22.374 | 22.324 | 22.374 | 22.374 | 22.374 | 22.796 |       |
| 9. <i>C. perplexa</i> [MH670545]      | 21.461 | 21.766 | 21.713 | 21.766 | 21.766 | 21.766 | 22.340 | 0.912 |

**Table S2.** Pairwise distances (Tamura-Nei distance) based on 1,728 bp between 18SrRNA sequences among species in Canuellidae.

| Species [NCBI Accession Number]                | 1     | 2     | 3     | 4     | 5     |
|------------------------------------------------|-------|-------|-------|-------|-------|
| 1. <i>S. daecheonensis</i> sp. nov. [OP454041] |       |       |       |       |       |
| 2. <i>S. daecheonensis</i> sp. nov. [OP454042] | 0     |       |       |       |       |
| 3. <i>S. wonchoeli</i> sp. nov. [OP454039]     | 2.953 | 2.953 |       |       |       |
| 4. <i>S. wonchoeli</i> sp. nov. [OP454040]     | 3.214 | 3.214 | 0.261 |       |       |
| 5. <i>C. perplexa</i> [MF077725]               | 8.565 | 8.565 | 8.174 | 8.406 |       |
| 6. <i>C. perplexa</i> [MF077726]               | 8.507 | 8.507 | 8.174 | 8.406 | 0.237 |
